# Supplementary material for: Etched current collector-guided creation of wrinkles in steel-mesh-supported V6O13 cathode for lithium-ion batteries
Source: Royal Society of Chemistry journal article supplement (doi:10.1039/c6ta09874f), 2016-11-23
Supplement: c6ta09874f1.pdf [file c6ta09874f1.pdf]

## Supporting information

### Etched current collector-guided creation of wrinkles in steel mesh supported $V_6O_{13}$ cathode for lithium-ion batteries

Zupeng Wu,<sup>a</sup> Weitao Qiu,<sup>a</sup> Yuxin Chen,<sup>b</sup> Yang Luo,<sup>a</sup> Yongchao Huang,<sup>a</sup> Qiufen Lei,<sup>c</sup> Shoubin Guo,<sup>c</sup> Peng Liu,<sup>a</sup> Muhammad-Sadeeq Balogun<sup>a</sup> and Yexiang Tong<sup>a</sup>

<sup>a</sup>MOE of the Key Laboratory of Bioinorganic and Synthetic Chemistry, KLGHEI of Environment and Energy Chemistry, The Key Lab of Low-carbon Chem & Energy Conservation of Guangdong Province, School of Chemistry and Chemical Engineering, Sun Yat-Sen University, 135 Xingang West Road, Chemical North Building 325, Guangzhou, China, 510275

<sup>b</sup>Instrumental Analysis & Research Center, Sun Yat-sen University, Guangzhou, China, 510275

<sup>c</sup>Battery Material Business Division, Guangzhou Tinci Materials Technology Co., Ltd., Guangzhou, P. R. China, 510760

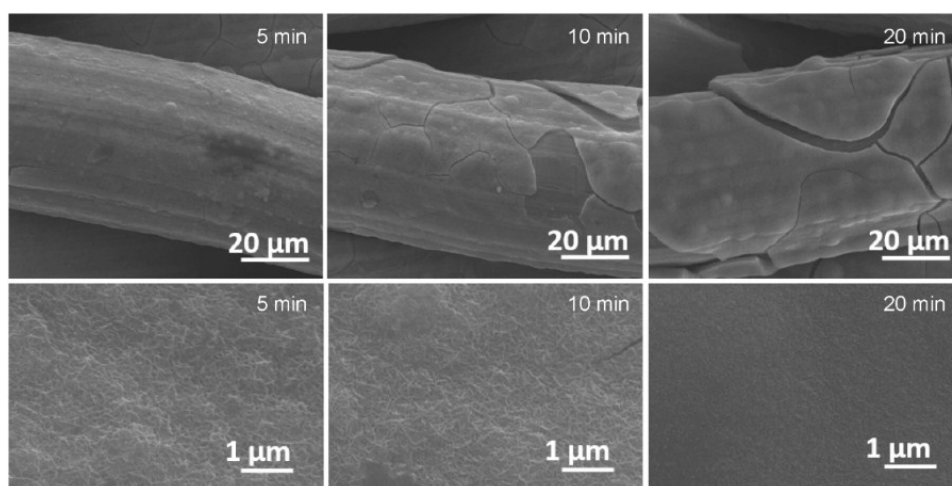

**Figure S1.** SEM images of as-deposited  $MnO_2$  on 3D stainless mesh. From left to right: samples with 5, 10 and 20 min deposition.

**Table S1.** Summary of  $V_6O_{13}$  electrochemical performance (electrode area  $1\text{ cm}^2$ ,  $500\text{ mA g}^{-1}$ )

| Electrode | Mass / mg | Rate capacity/mAh $g^{-1}$ | Total capacity / mAh | Energy density / Wh $kg^{-1}$ | Power density / W $kg^{-1}$ |
|-----------|-----------|----------------------------|----------------------|-------------------------------|-----------------------------|
| VO-5      | 0.62      | 164                        | 0.10                 | 517                           | 1576                        |
| VO-10     | 1.28      | 94                         | 0.12                 | 302                           | 1606                        |
| VO-20     | 2.49      | 84                         | 0.21                 | 280                           | 1666                        |
| eVO-10    | 1.23      | 192                        | 0.24                 | 477                           | 1242                        |

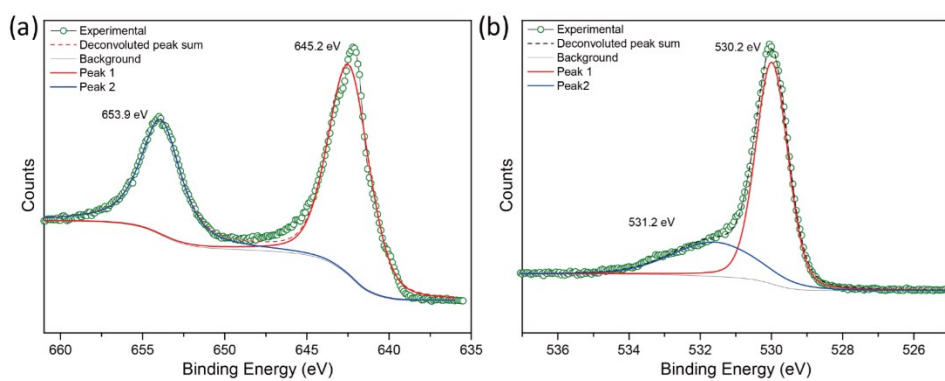

**Figure S2.** XPS for as-deposited MnO<sub>2</sub>. (a) Mn 2p spectrum. (b) O 1s spectrum.

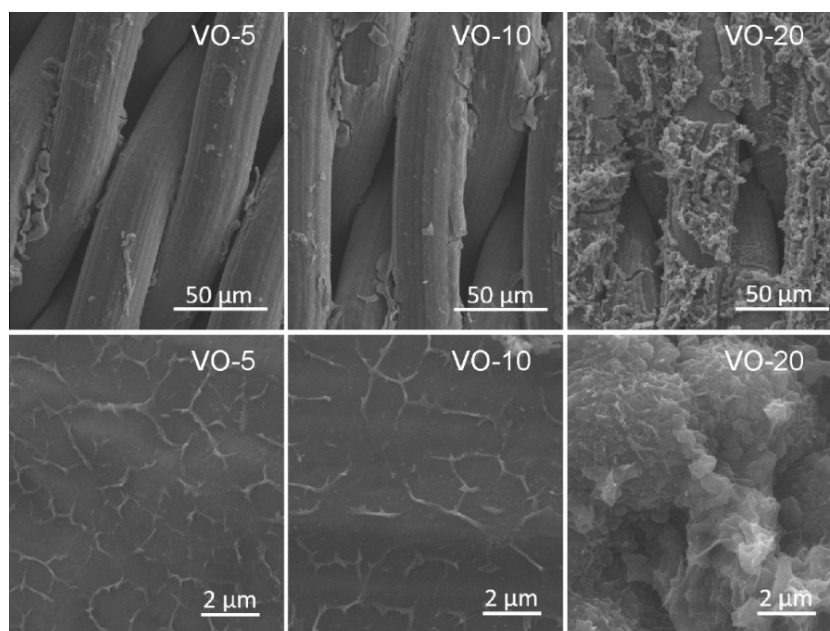

**Figure S3.** SEM images of VO-5, VO-10 and VO-20, which were converted from MnO<sub>2</sub> precursors.

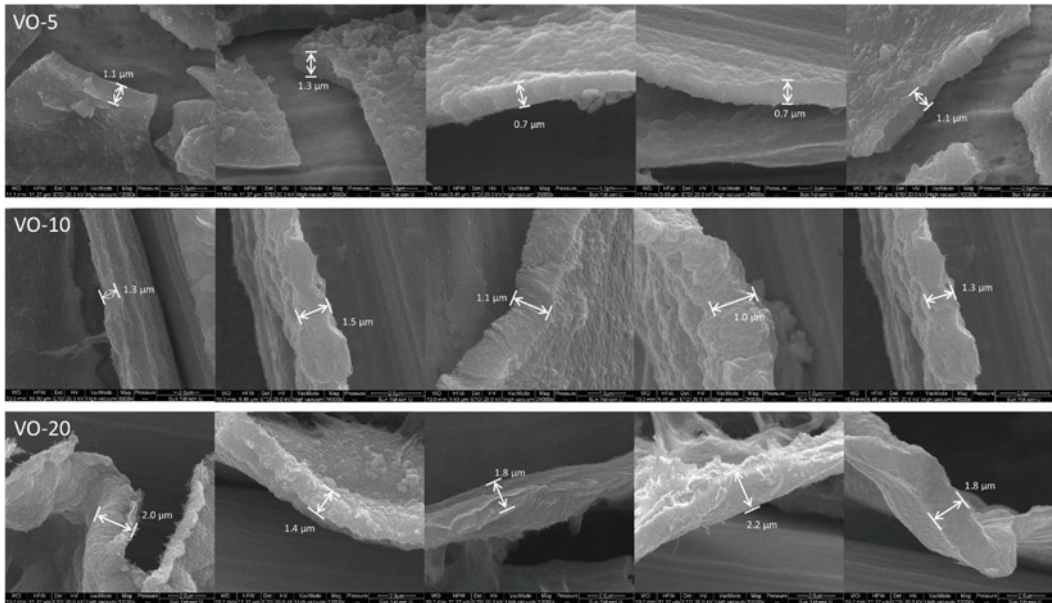

**Figure S4.** The thickness measurement of VO-5, VO-10 and VO-20, for each sample 5 representative images are shown.

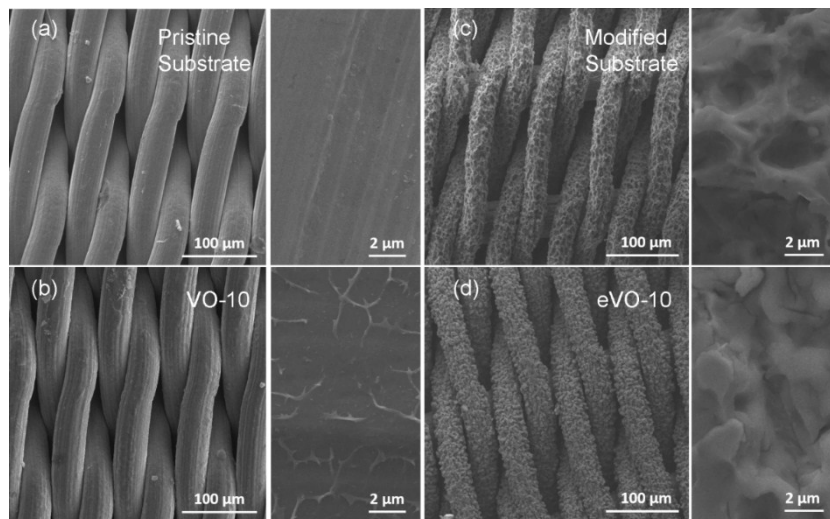

**Figure S5.** Low-magnification SEM images of (a) unmodified substrate, (b) VO-10, (c) modified substrate and (d) eVO-10.

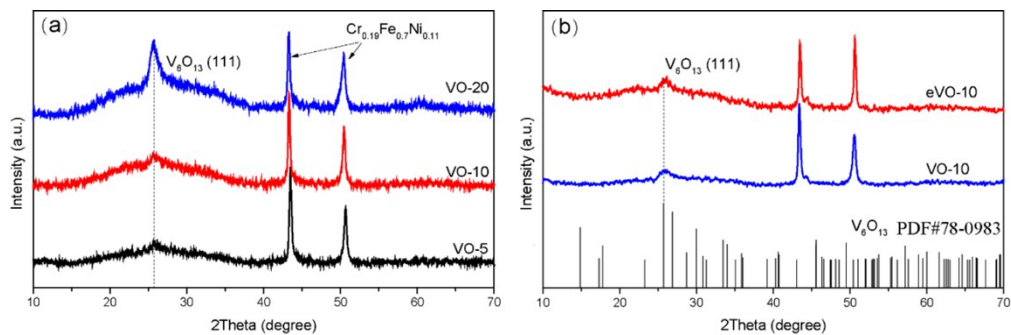

**Figure S6.** (a) XRD patterns for VO-5, VO-10 and VO-20. (b) XRD pattern for eVO-10, VO-10 pattern is shown for comparison. Peaks for stainless steel are marked out.

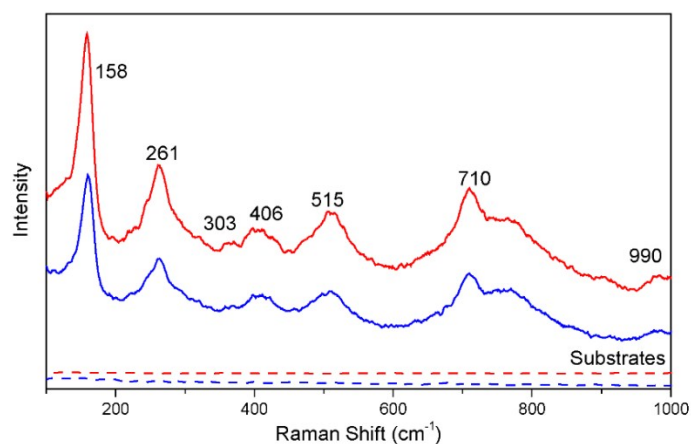

**Figure S7.** Raman spectra of VO-10 (blue), eVO-10 (red), pristine substrate (blue dashed) and modified substrate (red dashed).

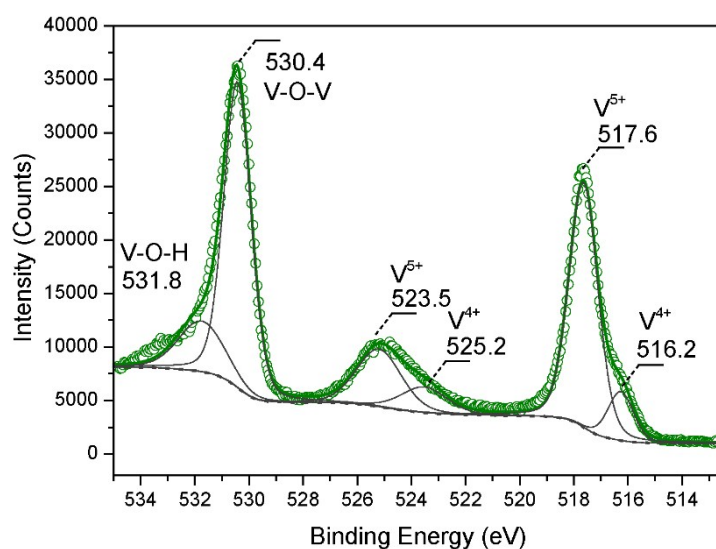

**Figure S8.** O 1s and V 2p spectra, deconvoluted to six components as indicated in figure.

**Table S2.** Fitting results of XPS spectra of eVO-10

| Peak                       | Position (eV) | Area    |
|----------------------------|---------------|---------|
| 1 (O 1s)                   | 531.8         | 11041.0 |
| 2 (O 1s)                   | 530.4         | 39680.8 |
| 3 (V 2p, V <sup>5+</sup> ) | 525.2         | 12206.8 |
| 4 (V 2p, V <sup>4+</sup> ) | 523.5         | 5576.7  |
| 5 (V 2p, V <sup>5+</sup> ) | 517.6         | 33474.7 |
| 6 (V 2p, V <sup>4+</sup> ) | 516.3         | 5916.6  |

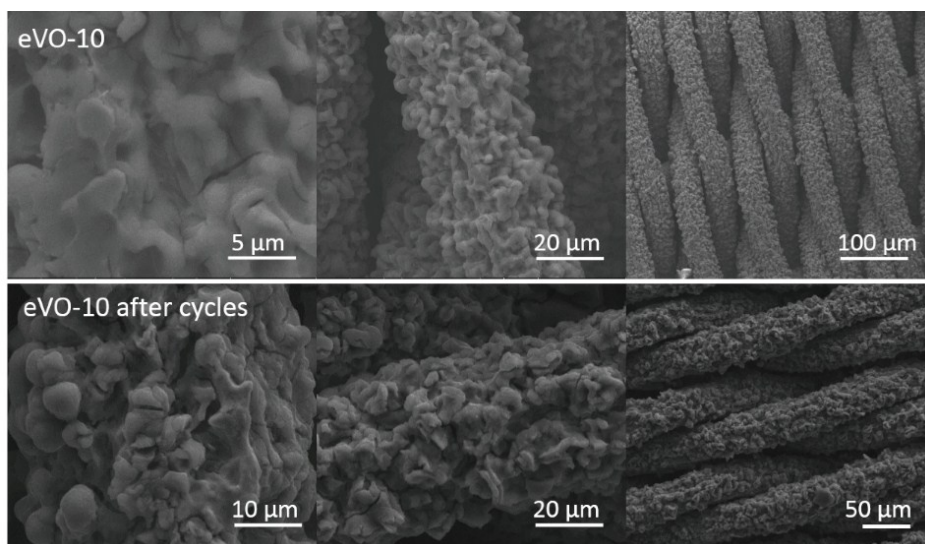

**Figure S9.** SEM images of eVO-10 before (upper) and after cycling (lower).

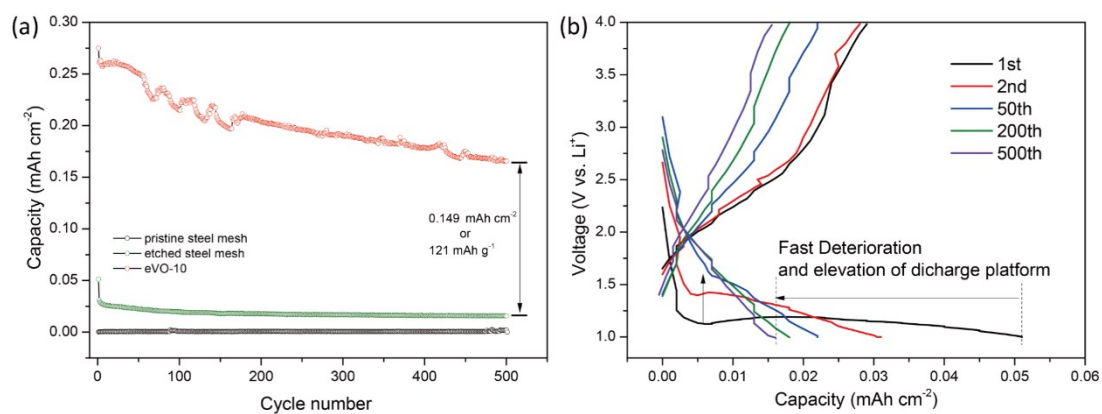

**Figure S10.** (a) Comparison among pristine steel mesh, etched steel mesh and eVO-10, showing small contribution from substrate. (b) Charge and discharge profile of etched substrates with fast deterioration rate.

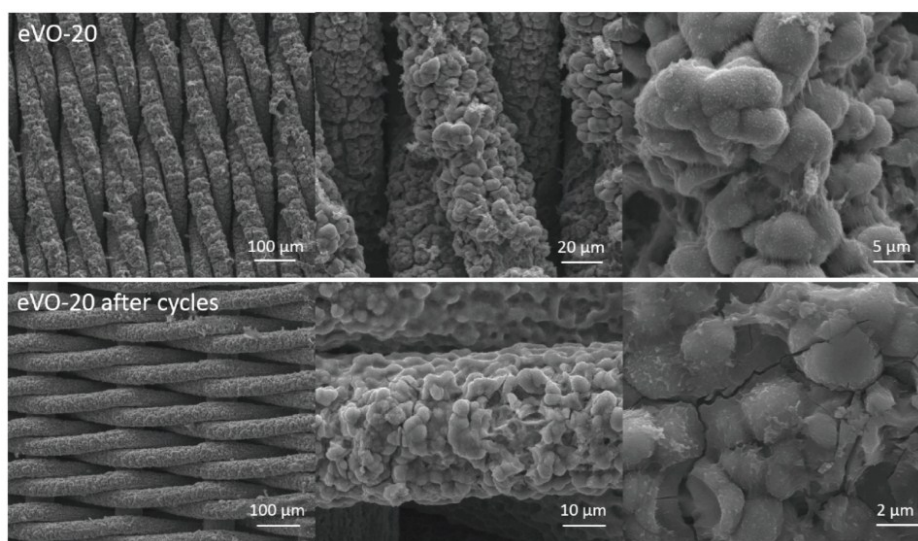

**Figure S11.** SEM images of eVO-20 on etched substrate before and after cycles.

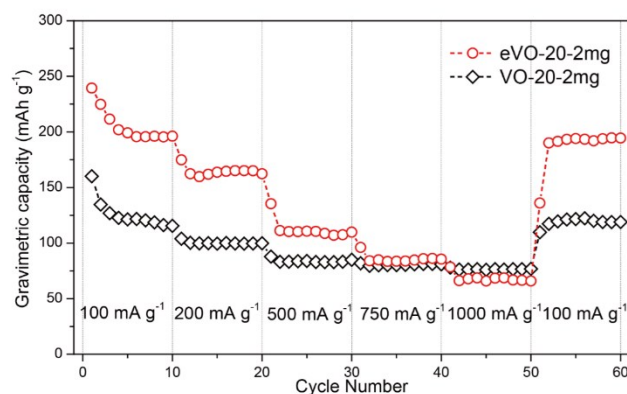

**Figure S12.** Rate performance of eVO-20 ( $1.98 \text{ mg cm}^{-2}$ ) in comparison with VO-20-2mg, a control sample with  $2.12 \text{ mg cm}^{-2}$  loading.

### Calculation of energy density

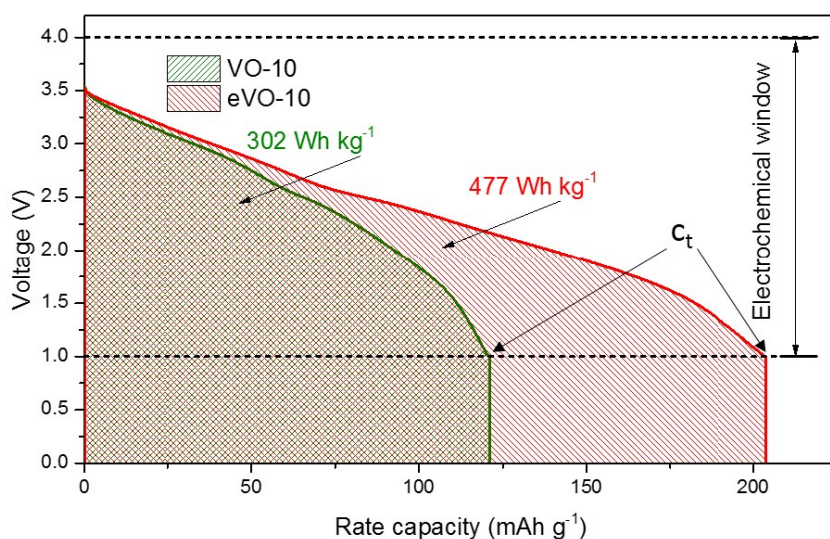

**Figure S13.** Illustration for energy density calculation, the shaded area equals to energy density.

The energy density provided in the table was calculated from discharge curve using following equation:

$$\text{Energy Density (E)} = \int_0^{C_t} Vdc$$

Where  $V$  stands for cell voltage recorded in real time (V) and  $c$  represents rate capacity.  $C_t$  is the rate capacity measured at the terminal point in the discharging process ( $\text{mAh g}^{-1}$ ), as illustrated in Figure SX1. On the other hand, power density is accordingly calculated by dividing energy density with discharge time (rate capacity divided by current density).
